# Supplementary material
Source: publisher figshare collection journal article supplement (https://sage.figshare.com/ndownloader/files/14392670)
Supplement: Supplementary file 1 [file 14392670]

# Survey Questions

## 1. How did you hear about the Forum? CHECK ALL THAT APPLY

- ☐ Friend
 ☐ Newspaper
 ☐ While passing the event location  
☐ Coworker
 ☐ Flyer
 ☐ Other \_\_\_\_\_  
☐ Family member
 ☐ Website

## 2. Why did you attend the Forum today? CHECK ALL THAT APPLY

- ☐ For networking
 ☐ To support the organization
 ☐ Other \_\_\_\_\_  
☐ Interest in event topic
 ☐ To become informed on the topic

## 3. Which of the following best describes your organization and/or community that you are representing at this Forum? CHECK ALL THAT APPLY

- ☐ Advocacy organization
 ☐ Health care organization
 ☐ Non-profit/community-based organization  
☐ Community where I live
 ☐ Public health organization
 ☐ Private business  
☐ Government agency
 ☐ K-12 education institution
 ☐ Faith-based organization  
☐ Correctional agency
 ☐ Higher education institution
 ☐ Other \_\_\_\_\_

## 4. Using the scale below, please rate the following items related to your experience at the Forum

|                                                                                         | Strongly Disagree     | Disagree              | Neither disagree nor agree | Agree                 | Strongly Agree        |
|-----------------------------------------------------------------------------------------|-----------------------|-----------------------|----------------------------|-----------------------|-----------------------|
| The Forum was informative and useful                                                    | <input type="radio"/> | <input type="radio"/> | <input type="radio"/>      | <input type="radio"/> | <input type="radio"/> |
| The Forum met my expectations                                                           | <input type="radio"/> | <input type="radio"/> | <input type="radio"/>      | <input type="radio"/> | <input type="radio"/> |
| I plan on contacting people I met at the Forum to follow-up on ideas we discussed       | <input type="radio"/> | <input type="radio"/> | <input type="radio"/>      | <input type="radio"/> | <input type="radio"/> |
| I hope there is a similarly themed Forum next year                                      | <input type="radio"/> | <input type="radio"/> | <input type="radio"/>      | <input type="radio"/> | <input type="radio"/> |
| The Forum provided useful tools to address drug abuse that are relevant to my community | <input type="radio"/> | <input type="radio"/> | <input type="radio"/>      | <input type="radio"/> | <input type="radio"/> |
| I learned new information about how to help my community address drug abuse             | <input type="radio"/> | <input type="radio"/> | <input type="radio"/>      | <input type="radio"/> | <input type="radio"/> |
| I now feel more aware of prescription drug abuse in my community                        | <input type="radio"/> | <input type="radio"/> | <input type="radio"/>      | <input type="radio"/> | <input type="radio"/> |
| I now feel more aware of heroin and meth abuse in my community                          | <input type="radio"/> | <input type="radio"/> | <input type="radio"/>      | <input type="radio"/> | <input type="radio"/> |

## 5. Using the scale below, how likely is it that you would attend a similar Forum in the future?

|                   |   |   |   |   |                  |   |   |   |   |    |
|-------------------|---|---|---|---|------------------|---|---|---|---|----|
| Not at all likely |   |   |   |   | Extremely likely |   |   |   |   |    |
| 0                 | 1 | 2 | 3 | 4 | 5                | 6 | 7 | 8 | 9 | 10 |

## Survey Questions

**6. Using the scale below, please rate your satisfaction with the following parts of the Forum**

|                                | Very dissatisfied     | Somewhat dissatisfied | Neutral               | Somewhat satisfied    | Very satisfied        |
|--------------------------------|-----------------------|-----------------------|-----------------------|-----------------------|-----------------------|
| Location                       | <input type="radio"/> |
| Exhibits/sessions              | <input type="radio"/> |
| Ease of transportation/parking | <input type="radio"/> |
| Length of event                | <input type="radio"/> |
| Topic/theme                    | <input type="radio"/> |

**7. What was the most beneficial part of the Forum?**

**8. What changes would you like to see in future Forums?**

**9. What do you think the community should do to move forward against substance misuse?**

**10. If you are here because of your work please answer the following:**

|                                                                                                           | Strongly Disagree     | Disagree              | Neither disagree nor agree | Agree                 | Strongly Agree        |
|-----------------------------------------------------------------------------------------------------------|-----------------------|-----------------------|----------------------------|-----------------------|-----------------------|
| The Forum provided me with opportunities to network with others in my profession                          | <input type="radio"/> | <input type="radio"/> | <input type="radio"/>      | <input type="radio"/> | <input type="radio"/> |
| The Forum provided me with opportunities to network with others outside of my profession                  | <input type="radio"/> | <input type="radio"/> | <input type="radio"/>      | <input type="radio"/> | <input type="radio"/> |
| Based on this Forum, I will make changes in my work/studies to address drug abuse issues in our community | <input type="radio"/> | <input type="radio"/> | <input type="radio"/>      | <input type="radio"/> | <input type="radio"/> |
| I plan to collaborate with people I met today about how we can prevent drug abuse in our community        | <input type="radio"/> | <input type="radio"/> | <input type="radio"/>      | <input type="radio"/> | <input type="radio"/> |

**Please tell us about yourself**

**11. What is your age?**

- |                               |                               |                                   |
|-------------------------------|-------------------------------|-----------------------------------|
| <input type="radio"/> 18 – 24 | <input type="radio"/> 35 – 44 | <input type="radio"/> 55 – 64     |
| <input type="radio"/> 25 – 34 | <input type="radio"/> 45 – 54 | <input type="radio"/> 65 or older |

**12. What is your current gender identity?**

- |                              |                                   |                                            |
|------------------------------|-----------------------------------|--------------------------------------------|
| <input type="radio"/> Female | <input type="radio"/> Transgender | <input type="radio"/> Prefer not to answer |
| <input type="radio"/> Male   | <input type="radio"/> Other _____ |                                            |

**13. What is your race/ethnicity? CHECK ALL THAT APPLY**

- |                                            |                                                          |                                                |
|--------------------------------------------|----------------------------------------------------------|------------------------------------------------|
| <input type="radio"/> White                | <input type="radio"/> Black or African American          | <input type="radio"/> Asian / Pacific Islander |
| <input type="radio"/> Hispanic or Latino   | <input type="radio"/> Native American or American Indian | <input type="radio"/> Other _____              |
| <input type="radio"/> Prefer not to answer |                                                          |                                                |

**14. If you are representing a professional organization at this Forum, in what town are you currently employed?**

- |                              |                                     |                                    |
|------------------------------|-------------------------------------|------------------------------------|
| <input type="radio"/> Town A | <input type="radio"/> Town D        | <input type="radio"/> Other: _____ |
| <input type="radio"/> Town B | <input type="radio"/> Reservation A |                                    |
| <input type="radio"/> Town C | <input type="radio"/> Reservation B |                                    |

**15. If you are representing a community where you live at this Forum, in which town do you reside?**

- |                              |                                     |                                    |
|------------------------------|-------------------------------------|------------------------------------|
| <input type="radio"/> Town A | <input type="radio"/> Town D        | <input type="radio"/> Other: _____ |
| <input type="radio"/> Town B | <input type="radio"/> Reservation A |                                    |
| <input type="radio"/> Town C | <input type="radio"/> Reservation B |                                    |

**16. What is the highest degree or level of education you have completed?**

- |                                                                                      |                                                           |                                           |
|--------------------------------------------------------------------------------------|-----------------------------------------------------------|-------------------------------------------|
| <input type="radio"/> Less than a high school degree                                 | <input type="radio"/> Trade/technical/vocational training | <input type="radio"/> Masters degree      |
| <input type="radio"/> High school graduate, diploma or equivalent (for example: GED) | <input type="radio"/> Associate degree                    | <input type="radio"/> Professional degree |
| <input type="radio"/> Some college credit                                            | <input type="radio"/> Bachelor's degree                   | <input type="radio"/> Doctorate degree    |
